# Supplementary material for: Biomass chitosan-derived Co-induced N-doped carbon nanotubes to support Mn3O4 as efficient electrocatalysts for rechargeable Zn–air batteries
Source: Royal Society of Chemistry journal article supplement (doi:10.1039/d3se00051f), 2023-01-01
Supplement: d3se00051f1.pdf [file d3se00051f1.pdf]

## **Biomass chitosan-deriving Co-induced N-doped carbon nanotubes to support Mn<sub>3</sub>O<sub>4</sub> as efficient electrocatalysts for Rechargeable Zn-air Battery**

Wenshu Zhou <sup>a, b, c</sup>, Yanyan Liu <sup>a, c, d</sup>, Dichao Wu <sup>a</sup>, Limin Zhou<sup>d</sup>, Gaoyue Zhang <sup>a</sup>, Kang Sun <sup>a</sup>, Baojun Li <sup>d</sup>, Jianchun Jiang <sup>a, b, \*</sup>

<sup>a</sup> Institute of Chemical Industry of Forest Products, Chinese Academy of Forestry (CAF), National Engineering Lab. for Biomass Chemical Utilization, Key and Open Lab. of Forest Chemical Engineering, SFA, Nanjing, Jiangsu Province, 210042, China

<sup>b</sup> Co-Innovation Center of Efficient Processing and Utilization of Forest Resources, Nanjing Forestry University, Nanjing, China

<sup>c</sup> College of Science, Henan Agricultural University, Zhengzhou, China

<sup>d</sup> College of Chemistry and Molecular Engineering, Zhengzhou University, Zhengzhou, China

<sup>e</sup> College of Food Science and Engineering, Nanjing University Of Finance & Economics, Nanjing, China

\* Corresponding Author. E-mail: jiangjc@icifp.cn (J.C. Jiang)

## **Experimental section**

### **Experimental section**

#### **Materials**

Chitosan (deacetylation degree of 85%, and purity 99.5%), Cobalt(II) Acetate Tetrahydrate (Co(Ac)<sub>2</sub>·4H<sub>2</sub>O, 99%), Manganese(II) Acetate Tetrahydrate (Mn(Ac)<sub>2</sub>·4H<sub>2</sub>O, 99%) and other chemicals (analytically pure) were obtained from Aladdin Reagent, and used as received without further purification.

#### **Synthesis of Co@NCNTs**

In a typical process of synthesizing Co@NCNTs, 1 g of chitosan was dissolved in 100 mL of 2% acetic acid solution followed by adding 80 mg of Co(Ac)<sub>2</sub> and 10 g of urea under stirring to achieve a uniform mixture. The uniform mixture was dried and transferred into a covered crucible, heated in a quartz tube under a protective argon flow of 80 sccm, and annealed at a desired temperature for 2 h, the temperature increasing at the rate of 10 °C min<sup>-1</sup>, followed by natural cooling to room temperature. NCS was synthesized without adding Co(Ac)<sub>2</sub>, and CS was synthesized without adding urea and Co(Ac)<sub>2</sub>.

## Synthesis of Mn<sub>3</sub>O<sub>4</sub>/NCNTs@Co

Mn(Ac)<sub>2</sub>·4H<sub>2</sub>O (0.05 g) and Co@NCNTs (0.08 g) were ultrasonically dissolved in 50 mL of deionized water and sonicated for 20 min. Then NH<sub>3</sub>·H<sub>2</sub>O (665 μL) was added by drop-wise. This mixture was transferred into an autoclave and heated at 180 °C for 12 h. After the reaction, the product was collected by filtration and washed with ultrapure water and ethanol 3 times. The final Mn<sub>3</sub>O<sub>4</sub>/NCNTs@Co was obtained by freeze-drying the precipitates. To illustrate the effect of cobalt and Mn<sub>3</sub>O<sub>4</sub> doping on the electrocatalytic activity, NCS-supported pristine Mn<sub>3</sub>O<sub>4</sub> nanocrystals was synthesized by the same process.

## Characterization

Transmission electron microscopy (TEM) images were collected from JEOL-JEM-2100 with elemental mappings collected by EDAX. The crystal structure of products were was identified by X-ray diffraction (XRD) using a Brüker D8 advance with Cu K $\alpha$  radiation ( $\lambda= 1.5418 \text{ \AA}$ ). Raman spectra was obtained on a Renishaw RM-1000 with Ar-ion laser ( $\lambda=514 \text{ nm}$ ). X-ray photoelectron spectroscopy (XPS) was investigated on the Thermo Scientific K-Alpha+ with Al K $\alpha$  X-ray as the excitation source. N<sub>2</sub> sorption isotherms were measured on a urface area and porosity analyzer (Micrometrics Tristar 3020 s) at 77.35 K.

All the electrochemical tests were carried out on a CHI 760E electrochemical workstation (CH Instruments, Inc, Shanghai) equipped with a rotating ring-disk electrode (RRDE) system in a standard three-electrode system with KOH as the electrolyte a platinum wire as the counter electrode, Hg/HgO electrode as the reference electrode and a modified glassy carbon electrode as the working electrode. All the measured potentials were calibrated relative to the reversible hydrogen electrode (RHE) according to the following calculation:

$$E_{\text{RHE}} = E_{\text{Hg/HgO}} + 0.098 + 0.059\text{pH} \quad (1)$$

The working electrodes were prepared as follows: 4 mg of the electrocatalyst was dispersed into a mixed solvent containing with ethanol and nafion (v/v=720/80) to form the homogeneous dispersion by ultrasonication treatment for 60 min. Then, 10 μL of the above solution was pipetted onto a polished glassy-carbon rotating risk electrode and dried at room temperature. The cyclic voltammetric (CV) measurements was performed in O<sub>2</sub>/N<sub>2</sub>-saturated 0.1 M KOH until obtaining a stable profile. Then, the linear sweep voltammetry (LSV) curves were measured to evaluate ORR or OER activity, respectively. The presented current density was normalized to the geometric surface area of electrodes. The poison

tests for ORR were performed in mixed solution containing KOH (0.1 M) and CH<sub>3</sub>OH (1 M). Rotating ring disk electrode (RRDE) measurements were carried out in O<sub>2</sub>-saturated KOH (0.1 M) at 1600 rpm with a scan rate of 5 mV s<sup>-1</sup>, and the potential of the Pt ring was set at 1.3 V (vs RHE). The yield of H<sub>2</sub>O<sub>2</sub> and the electron transfer number (*n*) were calculated by the following equation:

$$n = \frac{4I_D}{I_D + I_R / N} \quad (2)$$

$$[\text{H}_2\text{O}_2]\% = \frac{200I_R / N}{I_R / N + I_D} \quad (3)$$

where *I<sub>D</sub>* and *I<sub>R</sub>* are the disk and ring currents, respectively. *N* is the collection coefficient at the ring in RRDE experiments (*N*=0.37).

A home-made aqueous rechargeable Zn-air battery were assembled with a polished Zn plate (thickness: 0.3 mm, area: 1 cm<sup>2</sup>) as the anode, carbon paper with catalyst-coated as the air cathode, and a 6.0 M KOH + 0.2 M Zn(CH<sub>3</sub>COO)<sub>2</sub>·2H<sub>2</sub>O mixed solution as the electrolyte. The discharge/charge cycling of rechargeable Zn-air batteries were using recurrent galvanostatic pulses for 10 min of charge followed by 10 min of discharge at 5 mA cm<sup>-2</sup>. Polarization curve measurements (*v-i*) were performed by LSV at a scan rate of 10 mV s<sup>-1</sup>. The current and power density curves were calculated from the LSV curves. All tests are performed in a natural environment.

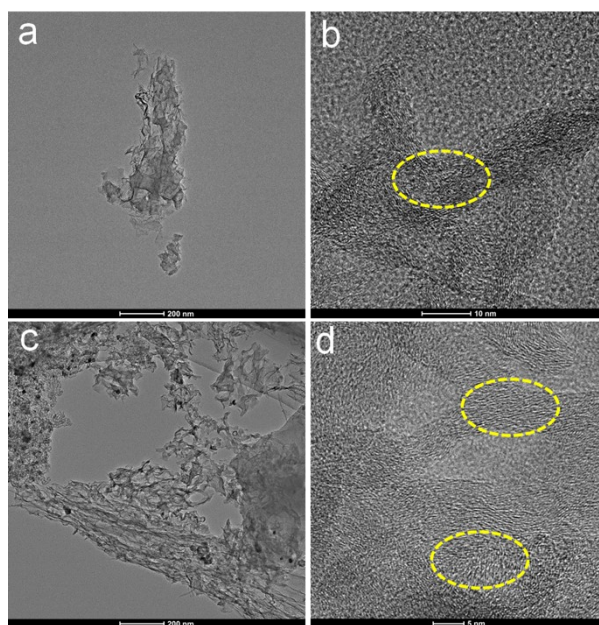

**Figure S1.** (a-b) TEM and HRTEM images of CS, (c-d) TEM and HRTEM images of NCS

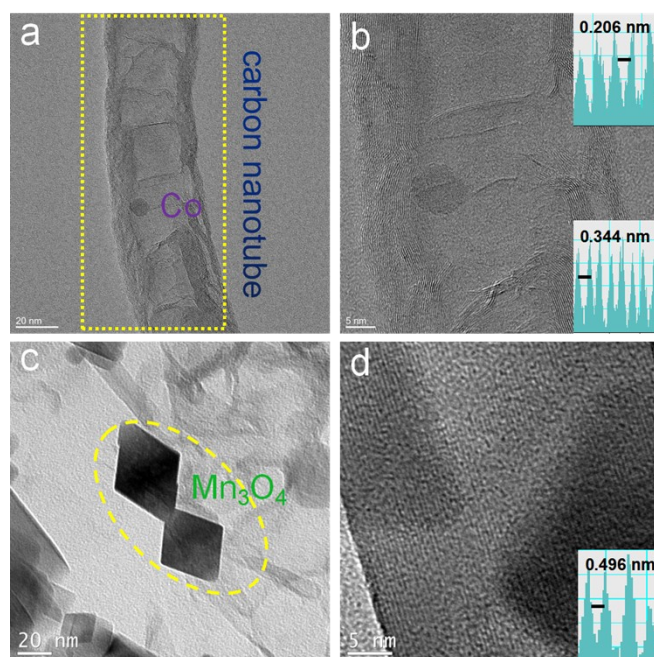

**Figure S2.** (a-b) TEM and HRTEM images of Co@NCNTs (including the corresponding atomic intensity profiles), (c-d) TEM and HRTEM images of Mn<sub>3</sub>O<sub>4</sub>/NCS (including the corresponding atomic intensity profiles)

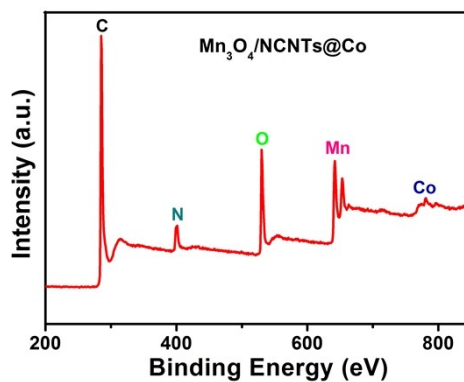

**Figure S3.** Survey spectrum of Mn<sub>3</sub>O<sub>4</sub>/NCNTs@Co

**Table S1.** The *t*-Plot report of CS, NCS, Co@NCNTs, Mn<sub>3</sub>O<sub>4</sub>/NCS and Mn<sub>3</sub>O<sub>4</sub>/NCNTs@Co.

| <i>t</i> -Plot report                    | average pore-size | specific surface area          | pore volume                     |
|------------------------------------------|-------------------|--------------------------------|---------------------------------|
|                                          | nm                | m <sup>2</sup> g <sup>-1</sup> | cm <sup>3</sup> g <sup>-1</sup> |
| CS                                       | 2.8               | 289                            | 1.08                            |
| NCS                                      | 2.5               | 338                            | 1.33                            |
| Co@NCNTs                                 | 2.3               | 167.6                          | 0.62                            |
| Mn <sub>3</sub> O <sub>4</sub> /NCS      | 2.4               | 179.8                          | 0.56                            |
| Mn <sub>3</sub> O <sub>4</sub> /NCNTs@Co | 2.1,              | 123.5                          | 0.37                            |

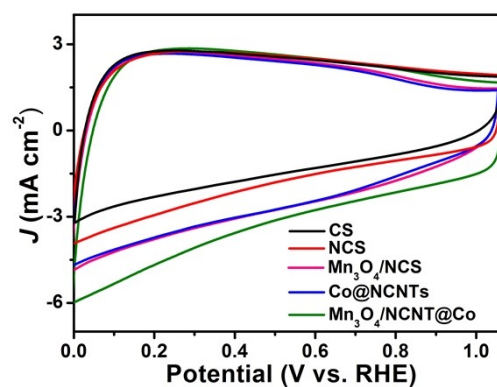

Figure S4. CV curves of CS, NCS, Co@NCNTs, Mn<sub>3</sub>O<sub>4</sub>/NCS and Mn<sub>3</sub>O<sub>4</sub>/NCNTs@Co in Ar<sub>2</sub>-saturated 0.1 M KOH

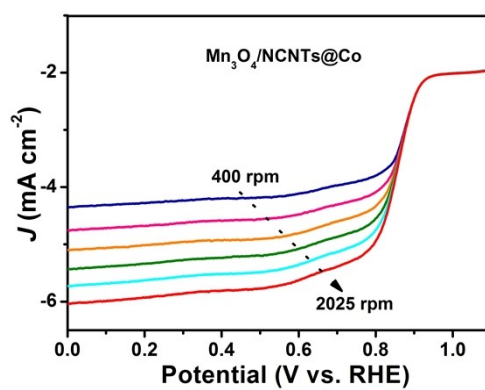

Figure S5. LSV curves of Mn<sub>3</sub>O<sub>4</sub>/NCNTs@Co at different rotating rates.

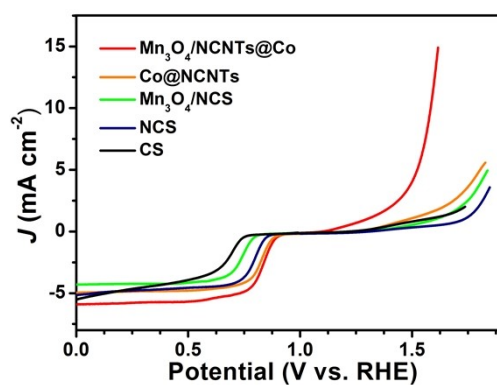

Figure S6. LSV curves of CS, NCS, Co@NCNTs, Mn<sub>3</sub>O<sub>4</sub>/NCS and Mn<sub>3</sub>O<sub>4</sub>/NCNTs@Co at 1800 rpm, showing the electrocatalytic activities for ORR and OER.

**Table S2** . the comparison of ORR, OER and dual catalytic performances in this work to some results from literatures.

| <b>Sample</b>                                                                                        | $E_{ORR}$<br><i>onset</i><br>[V] | $E_{ORR1/2}$<br>[V] | <b>Transferred electrons (<i>n</i>)</b> | $E_{OER}$ [V]<br>( <b><i>j</i>=10</b><br>mA cm <sup>-2</sup> ) | $\Delta E$<br>( <b><i>E</i><sub><i>j</i>=10</sub></b> -<br><b><i>E</i><sub>1/2</sub></b> )(V) | <b>RZABs cycle</b><br><br><b>Duration</b><br>[h] | <b>Ref.</b>      |
|------------------------------------------------------------------------------------------------------|----------------------------------|---------------------|-----------------------------------------|----------------------------------------------------------------|-----------------------------------------------------------------------------------------------|--------------------------------------------------|------------------|
| Mn <sub>3</sub> O <sub>4</sub> @HCM                                                                  | 0.75                             | 0.68                | 3.95                                    | -                                                              | -                                                                                             | 115                                              | S1               |
| Mn <sub>3</sub> O <sub>4</sub> /O-CNTs                                                               | 0.92                             | 0.85                | 3.95                                    | 1.65                                                           | 0.80                                                                                          | 160                                              | S2               |
| Mn <sub>3</sub> O <sub>4</sub> /N-CNT/GDL                                                            | 0.85                             | 0.70                | -                                       | -                                                              | -                                                                                             | 100                                              | S3               |
| Mn <sub>3</sub> O <sub>4</sub> /NiCo <sub>2</sub> S <sub>4</sub>                                     | 0.92                             | 0.81                | 3.99                                    | 1.55                                                           | 0.74                                                                                          | 217                                              | S4               |
| Ni-doped Mn <sub>2</sub> O <sub>3</sub>                                                              | 0.935                            | 0.80                | 3.986                                   | -                                                              | -                                                                                             | 50                                               | S5               |
| Co <sub>3</sub> O <sub>4</sub> /Mn <sub>3</sub> O <sub>4</sub> /N-rGO                                | 0.92                             | 0.86                | 3.96                                    | 1.59                                                           | 0.73                                                                                          | 400                                              | S6               |
| Mn <sub>3</sub> O <sub>4</sub> @CoMn <sub>2</sub> O <sub>4</sub> -<br>Co <sub>x</sub> O <sub>y</sub> | 0.90                             | 0.81                | 3.5                                     | 1.75                                                           | 0.94                                                                                          | -                                                | S7               |
| Mn <sub>3</sub> O <sub>4</sub> /NCNTs@Co                                                             | 0.92                             | 0.85                | ~4.0                                    | 1.53                                                           | 0.68                                                                                          | 366                                              | <b>This work</b> |

#### References:

- S1. Y.J. He, D. Aasen, H.Y. Yu, M. Labbe, D.G. Ivey, J.G.C. Veinot, Mn<sub>3</sub>O<sub>4</sub> nanoparticle-decorated hollow mesoporous carbon spheres as an efficient catalyst for oxygen reduction reaction in Zn-air batteries, *Nanoscale Adv.* 2 (2020) 3367-3374.
- S2. L.Q. Li, J. Yang, H.B. Yang, L.P. Zhang, J.J. Shao, W. Huang, B. Liu, X.C. Dong, Anchoring Mn<sub>3</sub>O<sub>4</sub> nanoparticles on oxygen functionalized carbon nanotubes as bifunctional catalyst for rechargeable Zinc-air battery, *ACS Appl. Energy Mater.* 1 (2018) 963-969.
- S3. D. Aasen, M. Clark, D.G. Ivey, A gas diffusion layer impregnated with Mn<sub>3</sub>O<sub>4</sub>-decorated N-doped carbon nanotubes for the oxygen reduction reaction in Zinc-air Batteries, *Batteries & Supercaps.* 2 (2019) 882-893.
- S4. F.B. Wang, G.D. Li, X.G. Meng, S.J. Xu, W.Q. Ma, One-dimensional Mn<sub>3</sub>O<sub>4</sub>/NiCo<sub>2</sub>S<sub>4</sub> nanocomposites as high-performance bifunctional electrocatalyst for rechargeable liquid/flexible Zn-air batteries, *J. Power Sources.* 462 (2020) 228162.

- S5. H. Kim, K. Min, S.E. Shim, D. Lim, S.-H. Ni-doped  $\text{Mn}_2\text{O}_3$  microspheres as highly efficient electrocatalyst for oxygen reduction reaction and Zn-air battery, *Int. J. Hydrogen energy*. 47 (2022) 2378-2388.
- S6. Q.K. Huang, X.W. Zhong, Q. Zhang, X. Wu, M.L. Jiao, B. Chen, J.Z. Sheng, G.M. Zhou,  $\text{Co}_3\text{O}_4/\text{Mn}_3\text{O}_4$  hybrid catalysts with heterointerfaces as bifunctional catalysts for Zn-air batteries, *J. Energy Chem.* 68 (2022) 679-681.
- S7. Z.H. Luo, E. Irtem, M. Ibáñez, R. Nafria, S. Martí-Sánchez, A. Genç, M. Mata, Y. Liu, D. Cadavid, J. Llorca, J. Arbiol, T. Andreu, J.R. Morante, A. Cabot,  $\text{Mn}_3\text{O}_4@\text{CoMn}_2\text{O}_4\text{-Co}_x\text{O}_y$  nanoparticles: partial cation exchange synthesis and electrocatalytic properties toward the oxygen reduction and evolution reactions, *ACS Appl. Mater. Interfaces*. 8 (2016) 17435-17444.
